# Supplementary material for: Transdisciplinary Strategies for Physician Wellness: Qualitative Insights from Diverse Fields
Source: Springer Nature journal article supplement (doi:10.1007/s11606-019-04913-y), 2019-04-29
Supplement: MOESM1 [file 16684758]

**Appendix A. Interview guide**

*We are studying opportunities to enhance doctor-patient connections during clinical care. As part of this effort, we are gathering information about how professionals from diverse fields create connections with individuals with whom they work (e.g., patients, clients, students, congregants). We appreciate your time – this interview should take approximately 30 minutes.*

1. Please describe your professional role and responsibilities.
2. What do you enjoy most about what you do?
3. Can you tell me a bit about instances in your professional work where you need to make personal connections with individuals (e.g., patients, congregants, consumers, trainees, clients)?
4. What do you do to create these connections? Are there specific things that you say or non-verbal gestures or actions that you use?

Prompt: “Can you give me an example of what that might sound/look like?”

1. Is there anything that you do to help you be more present (or fully emotionally available) in these moments?

Prompt: “For example, are there any habits you do before, during or after interactions that facilitate your engagement in these interactions? (e.g., rituals to center yourself and be mindful)”

1. Is there anything you do to build trust [with the people you work with]?
2. Is there anything you do to establish boundaries for the interaction? (e.g., time, etc.)
3. Is there anything in your environment that helps or hinders you when you are trying to create these connections?
4. I am curious about how you know that you’ve made a connection with someone. Can you think of a specific recent interaction and walk me through how you knew you made a connection?
5. Have you had times when it was difficult to connect? What did you do?
6. Do you change your strategies for different types of people? How so?
7. Do you change your strategies in different situations (e.g., in a crisis)?
8. Are there any resources that you have found useful in developing techniques to connect and be available and present with others? Are there any experts in your profession who you’d recommend we read about or contact?
9. Is there anything else that we should know about how you create these connections?

**Appendix B. Coding Guides**

Table 1. Coding guide

| **Structural Factors** | **Strategies for Connection** | **Professional Role/Identity** |
| --- | --- | --- |
| Technology | Mind-Body | Professional distress |
| Environment | Communication* | Mindfulness |
| Systems (Protocol) | Relationship Maintenance* | Perception of responsibility |
| Teamwork |  | Joy/meaning/guiding principles |
| Sequencing |  | Ritual |
| Time |  | Self-care |
| Training |  |  |
| Transitions (opening/closing) |  |  |

*= has sub codes

Table 2. Sub-Codes

| **Strategies for Connection** | |
| --- | --- |
| **Communication** | **Relationship Maintenance** |
| Nonverbal | Preparation/Doing Your Homework |
| Emotion Management | Crisis |
| Humor | Listening |
| Cultural Communication | Personalization |
| Paralinguistic | Boundaries |
| Self-Disclosure | Setting/Managing Expectations |
| Small Talk/Social Talk | Transference |
|  | Trust |
